# Supplementary material for: Silencing of E2F3 suppresses tumor growth of Her2+ breast cancer cells by restricting mitosis
Source: PubMed Central journal article supplement (PMC4741932; doi:10.18632/oncotarget.5686), 2015-10-26
Supplement: oncotarget-06-37316-s001.pdf [file oncotarget-06-37316-s001.pdf]

SUPPLEMENTARY FIGURE

A

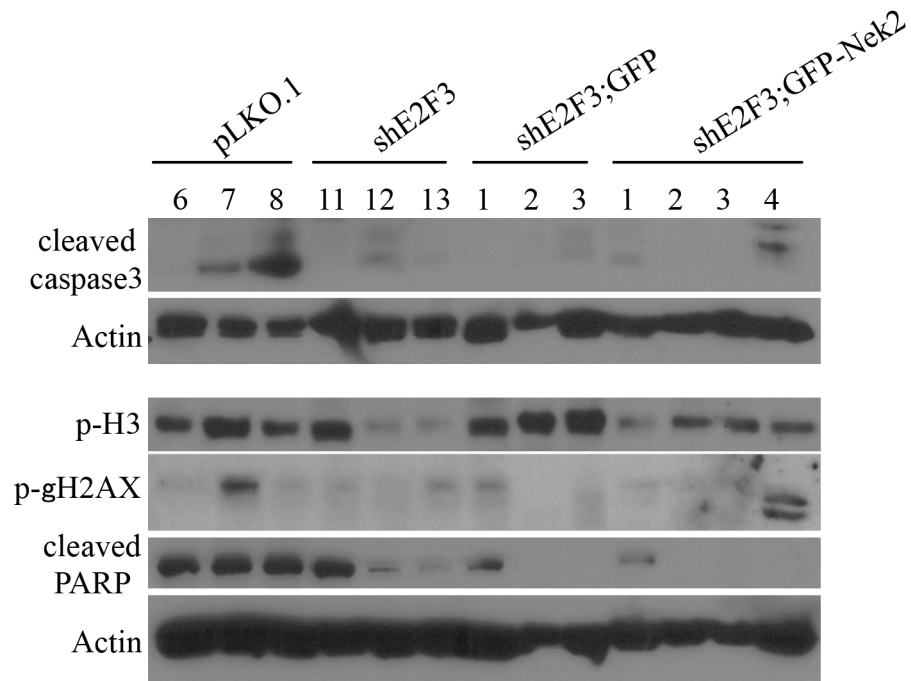

B

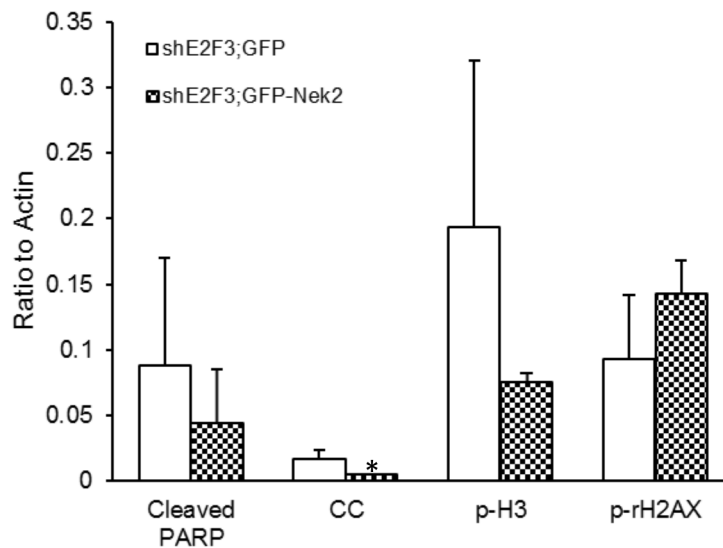

**Supplementary Figure S1: Generation of shE2F3;GFP cells and measurement of tumor growth.** A. An independent Western blot was performed in three new tumor samples of the pLKO.1 vs. shE2F3 group, and new tumors from the shE2F3; GFP vs. shE2F3;GFP-Nek2 groups. B. quantification of protein levels.
